# Supplementary material for: Accelerating AutoDock Vina with GPUs
Source: MDPI journal article supplement (doi:10.3390/molecules27093041), 2022-05-09
Supplement: s1 [file s1]

# Accelerating AutoDock Vina with GPUs

Shidi Tang,<sup>†,‡</sup> Ruiqi Chen,<sup>¶</sup> Mengru Lin,<sup>¶</sup> Qingde Lin,<sup>§</sup> Yanxiang Zhu,<sup>¶</sup> Ji Ding,<sup>†,‡</sup>

Haifeng Hu,<sup>||</sup> Ming Ling,<sup>§</sup> and Jiansheng Wu<sup>\*,†,‡</sup>

*<sup>†</sup>School of Geographic and Biological Information, Nanjing University of Posts and  
Telecommunications, Nanjing 210023, China*

*<sup>‡</sup>Smart Health Big Data Analysis and Location Services Engineering Research Center of  
Jiangsu Province, Nanjing 210023, China*

*<sup>¶</sup>VeriMake Research, Nanjing Renmian Integrated Circuit Technology Co., Ltd., Nanjing  
210088, China*

*<sup>§</sup>National ASIC System Engineering Technology Research Center, Southeast University,  
Nanjing 210096, China*

*<sup>||</sup>School of Telecommunication and Information Engineering, Nanjing University of Posts  
and Telecommunications, Nanjing 210003, China*

E-mail: jansen@njupt.edu.cn

# Supplementary Information

## Supplementary Tables

Table S1: An example of config.txt file

---

```
receptor = ./2bm2_protein.pdbqt  
ligand = ./2bm2_ligand.pdbqt  
center_x = 40.415  
center_y = 110.986  
center_z = 82.673  
size_x = 24.0  
size_y = 26.25  
size_z = 22.5
```

---

Table S2: Descriptions of experimental data

| PDBid | $N_{atom}$ | $N_{rot}$ |
|-------|------------|-----------|-------|------------|-----------|-------|------------|-----------|-------|------------|-----------|
| 5tim  | 5          | 0         | 1j3j  | 22         | 3         | 1jla  | 28         | 7         | 2x97  | 39         | 13        |
| 1aet  | 6          | 0         | 1p62  | 22         | 4         | 1r58  | 28         | 10        | 1os0  | 39         | 13        |
| 1ac8  | 8          | 0         | 1tz8  | 22         | 6         | 1t40  | 29         | 6         | 4tmn  | 39         | 14        |
| 2j5s  | 11         | 2         | 1u1c  | 22         | 7         | 1yvf  | 29         | 6         | 1t46  | 40         | 6         |
| 1w1p  | 12         | 0         | 1mmv  | 22         | 8         | 1unl  | 29         | 7         | 3bkk  | 40         | 14        |
| 1n2j  | 12         | 5         | 1u4d  | 23         | 0         | 1xoz  | 30         | 1         | 3ov1  | 41         | 12        |
| 1p2y  | 13         | 1         | 1sqn  | 23         | 2         | 1l7f  | 30         | 8         | 2xhm  | 42         | 14        |
| 2rdr  | 13         | 5         | 1yv3  | 23         | 2         | 1vcj  | 30         | 10        | 1h23  | 42         | 15        |
| 1lrh  | 14         | 2         | 4fev  | 23         | 3         | 1opk  | 31         | 4         | 4djr  | 43         | 15        |
| 1tni  | 14         | 5         | 2brt  | 23         | 4         | 1m2z  | 31         | 5         | 7cpa  | 43         | 15        |
| 1jd0  | 15         | 2         | 1k3u  | 23         | 6         | 2br1  | 31         | 7         | 3l3n  | 43         | 16        |
| 1n1m  | 15         | 3         | 1q41  | 24         | 1         | 2bsm  | 31         | 7         | 1w3l  | 43         | 16        |
| 1uwc  | 15         | 4         | 1t9b  | 24         | 3         | 1z95  | 31         | 8         | 2r23  | 43         | 19        |
| 1hww  | 16         | 3         | 1ia1  | 24         | 3         | 1qi0  | 31         | 12        | 3s8o  | 44         | 12        |
| 1q4g  | 17         | 3         | 1hp0  | 24         | 5         | 1a30  | 31         | 13        | 5kao  | 44         | 15        |
| 1tt1  | 17         | 4         | 1nav  | 24         | 6         | 3l4u  | 31         | 17        | 1sln  | 44         | 17        |
| 1of6  | 17         | 5         | 1meh  | 24         | 7         | 1s3v  | 32         | 6         | 2d1o  | 44         | 23        |
| 1x8x  | 17         | 5         | 1gkc  | 24         | 8         | 1hwi  | 32         | 10        | 1kzk  | 45         | 11        |
| 1hnn  | 18         | 2         | 3kwa  | 24         | 13        | 2bm2  | 33         | 7         | 3zso  | 45         | 13        |
| 1r9o  | 18         | 3         | 1gm8  | 25         | 4         | 1s19  | 33         | 8         | 5wlo  | 46         | 10        |
| 1n2v  | 18         | 3         | 1yqy  | 25         | 5         | 1v0p  | 33         | 8         | 1ygc  | 47         | 13        |
| 1sq5  | 18         | 8         | 1v48  | 25         | 6         | 1r1h  | 33         | 10        | 1u33  | 47         | 18        |
| 4elm2 | 18         | 14        | 1jje  | 25         | 7         | 1oyt  | 34         | 4         | 4gid  | 53         | 17        |
| 2ifb  | 18         | 14        | 1v4s  | 26         | 4         | 1hvy  | 34         | 9         | 3utu  | 54         | 16        |

|      |    |    |      |    |    |      |    |    |      |     |    |
|------|----|----|------|----|----|------|----|----|------|-----|----|
| 1uou | 19 | 2  | 1ke5 | 26 | 4  | 1pmn | 35 | 6  | 1hfs | 54  | 18 |
| 1hq2 | 19 | 2  | 1q1g | 26 | 5  | 1sj0 | 36 | 8  | 2xy9 | 54  | 18 |
| 1tow | 19 | 4  | 1g9v | 26 | 6  | 3oe5 | 36 | 11 | 3pww | 55  | 14 |
| 1l2s | 20 | 4  | 1lbk | 26 | 11 | 1lpz | 37 | 6  | 1u1b | 55  | 16 |
| 1w2g | 20 | 4  | 2wbg | 26 | 11 | 1y6b | 37 | 8  | 3cyx | 56  | 14 |
| 1sg0 | 20 | 5  | 1owe | 27 | 3  | 1uml | 37 | 11 | 1jyq | 60  | 20 |
| 1xm6 | 20 | 5  | 1oq5 | 27 | 5  | 3bpc | 37 | 15 | 3drf | 63  | 26 |
| 3uex | 20 | 16 | 3tmn | 27 | 7  | 1ywr | 38 | 5  | 2vaa | 87  | 32 |
| 1of1 | 21 | 4  | 1xoq | 27 | 7  | 1mzc | 38 | 8  | 2er7 | 89  | 32 |
| 1ig3 | 21 | 6  | 1r55 | 27 | 9  | 10gs | 38 | 14 | 4er4 | 93  | 30 |
| 1gpk | 22 | 1  | 1n46 | 28 | 5  | 3coy | 39 | 11 | 3er5 | 108 | 31 |

$N_{atom}$ : number of atoms in a ligand molecule.

$N_{rot}$ : number of rotatable bonds in a ligand molecule.

Table S3: Details of GPU cards used in this work

| Device                    | Peak Compute Performance |              | CUDA cores | On-board memory | Architecture |
|---------------------------|--------------------------|--------------|------------|-----------------|--------------|
|                           | FP32                     | FP64         |            |                 |              |
| NVIDIA Geforce GTX 1080ti | 11.34 TFLOPS             | 354.4 GFLOPS | 3584       | 6GB             | Pascal       |
| NVIDIA Geforce RTX 2080Ti | 13.45 TFLOPS             | 420.2 GFLOPS | 4352       | 11GB            | Turing       |
| NVIDIA Geforce RTX 3090   | 35.58 TFLOPS             | 556.0 GFLOPS | 10496      | 24GB            | Ampere       |

Both NVIDIA Geforce GTX 1080ti and NVIDIA Geforce RTX 2080ti are carried with Intel(R) Xeon(R) CPU E5-2678 v3 @ 2.50GHz; NVIDIA Geforce RTX 3090 is carried with Intel (R) Core (TM) i9-10900K CPU @ 3.7 GHz.

## Supplementary Figures

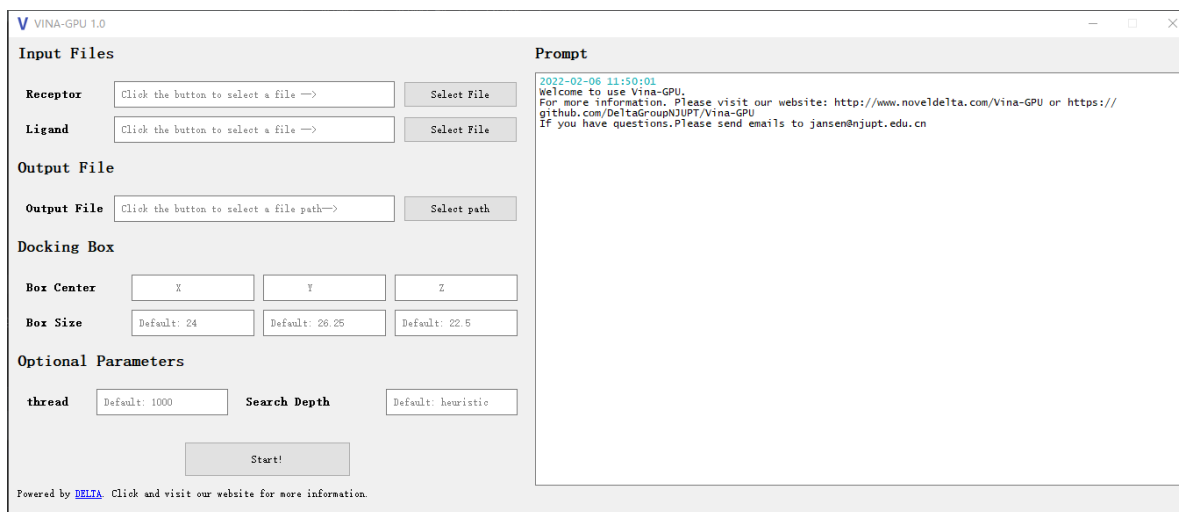

Figure S1: Graphic user interface (GUI) of Vina-GPU. It consists of five main components (Figure S9). The first one is the *input files* that defines both the ligand and the receptor, these files can be easily chosen by a *select file* button. The second one is the *output files* that determine the final output file of the ligand. The third one is the *docking box* that includes *box center* and *box size*, which determine the position and the size of a docking pocket. The fourth one is the configuration of optional values for parameters including *thread* and *search\_depth*. The last part is the running windows for outputting relevant execution information. Finally, Vina-GPU can be executed by the *start* button.

## Supplementary Text

**Text S1.** Guideline for running Vina-GPU (see [http://www.noveldelta.com/Vina\\_GPU](http://www.noveldelta.com/Vina_GPU) or <https://github.com/DeltaGroupNJUPT/Vina-GPU>)
